# Supplementary material for: Accelerating covering array generation by combinatorial join for industry scale software testing
Source: PeerJ journal article supplement (doi:10.7717/peerj-cs.720), 2022-02-11
Supplement: README.pdf [file README.pdf]

# README

This is a "readme" file for "supplemental materials" of our paper, "Accelerating covering array generation by combinatorial join for industry scale software testing".

The supplemental files are provided as `experiment.zip`. It contains a maven based Java project, raw experiment results, and their summaries. The project can be imported into your IDE such as IntelliJ or Eclipse and you can reproduce our experiments by running entry points that we created.

## Directory Structure

When you unarchive the file, you will have following directory structure.

```

./
pom.xml
src/
  main/
    java/
      com/
        github/
          dakusui/
  test/
    java/
      com/
        github/
          dakusui/
          peerj/ ①
            CasaExperimentSimple.java
            CasaExperimentSuite.java
            SyntheticModelSuiteForIncrementalGenerationWithActs.java
            SyntheticModelSuiteForIncrementalGenerationWithPict.java
            SyntheticModelSuiteForIncrementalGenerationWithWPJoin.java
            SyntheticModelSuiteForScratchGenerationWithActs.java
            SyntheticModelSuiteForScratchGenerationWithJCUnit.java
            SyntheticModelSuiteForScratchGenerationWithPict.java
            SyntheticModelSuiteForScratchGenerationWithWPJoin.java
            SyntheticModelSuiteForScratchGenerationWithWPJoinBasedOnJCUnit.java
            SyntheticModelSuiteForScratchGenerationWithWPJoinBasedOnPict.java
  resources/
    bin/
      {Your OS Name} ②
      pict
      acts_3.0.jar ③
    testresults/
      CHOICE_ORDER_IMPROVEMENT/ ④
      Summary/ ⑤
target/ ⑥
  acts/
  pict/

```

[1]: A directory that stores entry points to conduct experiments. [2]: A directory to store a PICT executable. We bundled PICT that we compiled on our local environment for macOS. [3]: Place your ACTS executable jar file here. [4]: A directory that stores our raw experiment results. [5]: Spreadsheets that summarized our experiment results are stored here. [6]: Your experiment results are stored under the directory of the engine name (*acts* or *pict*) you used.

## Maven-based Java project

# Installation and Execution

1. Unarchive the `.zip` file somewhere in your file system.
2. Place ACTS executable jar file in an appropriate directory.
3. Place PICT executable binary in an appropriate directory if necessary.
4. Import the `pom.xml` to your IDE.
5. Run one of the entry point classes as a JUnit test.

## ACTS

ACTS is not an open source software product, and you need to acquire its binary from here by its site owner.

```
https://csrc.nist.gov/Projects/automated-combinatorial-testing-for-software
```

Place the executable jar file under `src/test/resources/bin` directory as `acts_3.0.jar`.

## PICT

We have conducted our experiments on macOS and bundled PICT binary we used in the archive file. When you are going to reproduce the experiments on other OSes, you need to prepare the binary by yourself.

You can clone the code and you can build an executable binary of PICT for your OS by following the instruction found there.

```
https://github.com/microsoft/pict
```

The directory to place the binary is as follows.

```
src/test/resource/bin/{Your OS Name}
```

`{Your OS Name}` can be figured out by your JVM's system property `os.name`.

## Entry points

Directly under the directory `src/test/java/com.github.dakusui.peerj`, entry points that are used in our experiments are provided.

### Entry points for CASA data models

There are a couple of entry points, which are `CasaExperimentSimple` and the other is `CasaExperimentSuite`. The former is useful for checking if the installation is working fine. The latter contains the following inner classes, each of which can be used as an independent entry point.

- [Strength2](#)
- [Strength3](#)
- etc.

## Entry points for Synthetic models

Entry points for our synthetic model experiments are named `SyntheticModelSuite{Incremental,Scratch}With{Acts,Pict,WPJoin}`. Inside them, inner classes are defined to execute

Each of these inner classes can be used as an independent entry point. For instance, `SyntheticModelSuiteForScratchGenerationWithActs` has following inner classes, that you can use as independent entry points.

- [Debug](#)
- [Strength2](#)
- [Strength3](#)
- [Strength4](#)
- etc.

## Details about the CASA data models

They are found under the directory `src/test/resources/models/Real/2way`.

- APACHE (172 factors, 2-4 levels, 7 predicates)
- BUGZILLA (51 factors, 2 levels, 5 predicates)
- GCC (199 factors, 2 levels, 40 predicates)
- SPINS (18 factors, 2-4 levels, 13 predicates)
- SPINV (55 factors, 2-4 levels, 49 predicates)
- TCAS (12 factors, 2-10 levels, 3 predicates)

You can find the definition of the format [here](#). Note that the files contain the information about the strength (t), the tools we provide ignore it and use the strength explicitly for our experiments.

# Experiment Results

Under the directory `src/test/resources/testresults`, our experiment results are stored.

## Summary Spread-sheets

Under the directory `src/test/resources/testresults/Summary`, there are two spread-sheets,

- `peerj-wpjoin-result.xlsx`: A spread-sheet that summarizes the raw experiment results.
- `peerj-wpjoin-result-summary.xlsx`: A spread-sheet that we used for analyzing the experiment

results.

## Raw experiment results

Under the directory `src/test/resources/testresults/CHOICE_ORDER_IMPROVEMENT`, raw experiment results are found. Each directory has a name which describes stringth, use case scenario, data model, and optionally generation engine.
